# Supplementary material for: Identification of Logic Relationships between Genes and Subtypes of Non-Small Cell Lung Cancer
Source: PubMed Central journal article supplement (PMC3990524; doi:10.1371/journal.pone.0094644), 2014-04-17
Supplement: pone.0094644.s001.pdf [file pone.0094644.s001.pdf]

Supporting Information -Appendix S1: Significant GO terms obtained by Gorilla.

Part A. Significant GO terms on the AC and SCC specimens

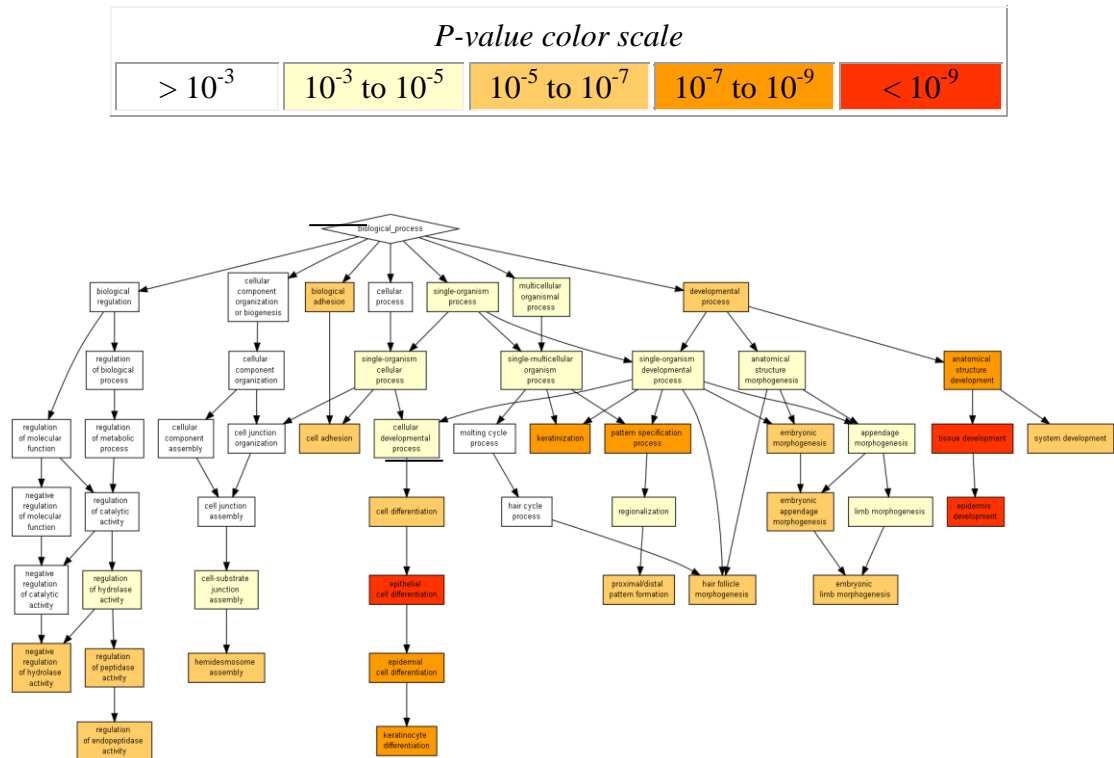

| GO term                    | Description                      | P-value  | FDR q-value | Enrichment (N, B, n, b)   |
|----------------------------|----------------------------------|----------|-------------|---------------------------|
| <a href="#">GO:0009888</a> | tissue development               | 6.42E-14 | 7.69E-10    | 7.20 (16095,527,106,25)   |
| <a href="#">GO:0008544</a> | epidermis development            | 3.58E-12 | 2.15E-8     | 27.84 (16095,106,60,11)   |
| <a href="#">GO:0030855</a> | epithelial cell differentiation  | 7.23E-12 | 2.89E-8     | 5.02 (16095,248,375,29)   |
| <a href="#">GO:0031424</a> | keratinization                   | 1.24E-9  | 3.73E-6     | 16.90 (16095,25,381,10)   |
| <a href="#">GO:0030216</a> | keratinocyte differentiation     | 3.94E-9  | 9.45E-6     | 29.13 (16095,52,85,8)     |
| <a href="#">GO:0048856</a> | anatomical structure development | 5.01E-8  | 1E-4        | 1.68 (16095,2395,484,121) |
| <a href="#">GO:0007389</a> | pattern specification process    | 5.18E-8  | 8.87E-5     | 2.04 (16095,376,1469,70)  |
| <a href="#">GO:0009913</a> | epidermal cell differentiation   | 5.97E-8  | 8.94E-5     | 21.04 (16095,72,85,8)     |
| <a href="#">GO:0048731</a> | system development               | 7.29E-7  | 9.72E-4     | 2.10 (16095,628,708,58)   |
| <a href="#">GO:0032502</a> | developmental process            | 1.58E-6  | 1.89E-3     | 2.23 (16095,3912,70,38)   |
| <a href="#">GO:0048598</a> | embryonic morphogenesis          | 1.61E-6  | 1.75E-3     | 3.50 (16095,375,282,23)   |

|                            |                                           |         |         |                          |
|----------------------------|-------------------------------------------|---------|---------|--------------------------|
| <a href="#">GO:0007155</a> | cell adhesion                             | 1.97E-6 | 1.96E-3 | 4.45 (16095,759,81,17)   |
| <a href="#">GO:0022610</a> | biological adhesion                       | 2.05E-6 | 1.89E-3 | 4.44 (16095,761,81,17)   |
| <a href="#">GO:0030326</a> | embryonic limb morphogenesis              | 3.75E-6 | 3.21E-3 | 7.39 (16095,85,282,11)   |
| <a href="#">GO:0035113</a> | embryonic appendage morphogenesis         | 3.75E-6 | 3E-3    | 7.39 (16095,85,282,11)   |
| <a href="#">GO:0052548</a> | regulation of endopeptidase activity      | 4.03E-6 | 3.02E-3 | 5.62 (16095,278,134,13)  |
| <a href="#">GO:0030154</a> | cell differentiation                      | 4.16E-6 | 2.93E-3 | 3.58 (16095,1364,66,20)  |
| <a href="#">GO:0051346</a> | negative regulation of hydrolase activity | 4.5E-6  | 3E-3    | 1.98 (16095,265,1654,54) |
| <a href="#">GO:0052547</a> | regulation of peptidase activity          | 5.84E-6 | 3.68E-3 | 5.44 (16095,287,134,13)  |
| <a href="#">GO:0009954</a> | proximal/distal pattern formation         | 7.84E-6 | 4.7E-3  | 6.63 (16095,26,934,10)   |
| <a href="#">GO:0031069</a> | hair follicle morphogenesis               | 7.99E-6 | 4.56E-3 | 17.51 (16095,28,197,6)   |
| <a href="#">GO:0031581</a> | hemidesmosome assembly                    | 9.77E-6 | 5.33E-3 | 894.17 (16095,12,3,2)    |

Species used: Homo sapiens

The system has recognized 18524 genes out of 19803 gene terms entered by the user. 18522 genes were recognized by gene symbol and 2 genes by other gene IDs . 47 duplicate genes were removed (keeping the highest ranking instance of each gene) leaving a total of 18477 genes. Only 16095 of these genes are associated with a GO term.

Part B. Significant GO terms on the NSCLC and Normal specimens

*P-value color scale*

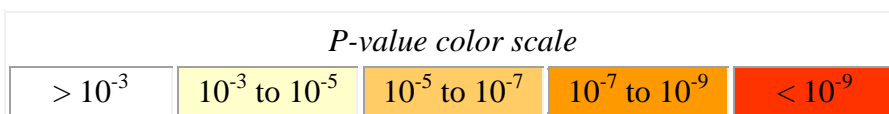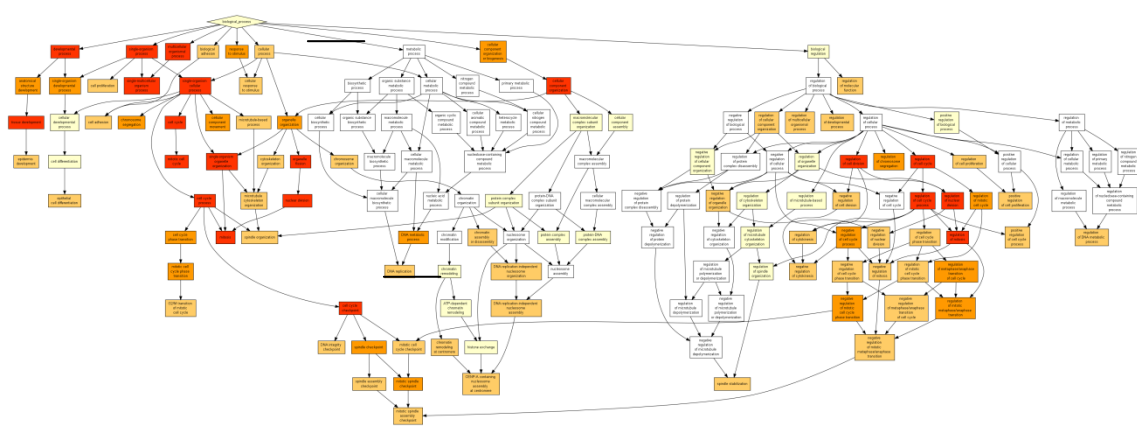

| <b>GO term</b>             | <b>Description</b>                    | <b><u>P-value</u></b> | <b><u>FDR q-value</u></b> | <b><u>Enrichment (N, B, n, b)</u></b> |
|----------------------------|---------------------------------------|-----------------------|---------------------------|---------------------------------------|
| <a href="#">GO:0022402</a> | cell cycle process                    | 1.18E-23              | 1.41E-19                  | 3.88 (16095,950,349,80)               |
| <a href="#">GO:0000278</a> | mitotic cell cycle                    | 1.94E-22              | 1.16E-18                  | 8.37 (16095,373,201,39)               |
| <a href="#">GO:0044763</a> | single-organism cellular process      | 1.03E-21              | 4.13E-18                  | 1.41 (16095,8183,596,426)             |
| <a href="#">GO:0007049</a> | cell cycle                            | 3.16E-21              | 9.47E-18                  | 6.42 (16095,545,207,45)               |
| <a href="#">GO:0044699</a> | single-organism process               | 1.95E-17              | 4.67E-14                  | 1.28 (16095,9830,627,492)             |
| <a href="#">GO:0051302</a> | regulation of cell division           | 3.63E-14              | 7.25E-11                  | 8.47 (16095,174,273,25)               |
| <a href="#">GO:0000280</a> | nuclear division                      | 8.36E-14              | 1.43E-10                  | 7.08 (16095,229,278,28)               |
| <a href="#">GO:0007067</a> | mitosis                               | 8.36E-14              | 1.25E-10                  | 7.08 (16095,229,278,28)               |
| <a href="#">GO:0048285</a> | organelle fission                     | 1.53E-13              | 2.03E-10                  | 6.64 (16095,253,278,29)               |
| <a href="#">GO:0010564</a> | regulation of cell cycle process      | 3.38E-13              | 4.06E-10                  | 4.21 (16095,397,376,39)               |
| <a href="#">GO:0000075</a> | cell cycle checkpoint                 | 4.17E-13              | 4.54E-10                  | 6.24 (16095,142,472,26)               |
| <a href="#">GO:0007088</a> | regulation of mitosis                 | 1.63E-11              | 1.63E-8                   | 10.12 (16095,99,273,17)               |
| <a href="#">GO:0051783</a> | regulation of nuclear division        | 1.63E-11              | 1.51E-8                   | 10.12 (16095,99,273,17)               |
| <a href="#">GO:0009888</a> | tissue development                    | 5.86E-11              | 5.02E-8                   | 1.91 (16095,527,1805,113)             |
| <a href="#">GO:0032502</a> | developmental process                 | 8.81E-11              | 7.04E-8                   | 1.44 (16095,3912,781,274)             |
| <a href="#">GO:0051726</a> | regulation of cell cycle              | 4.09E-10              | 3.06E-7                   | 2.91 (16095,698,381,48)               |
| <a href="#">GO:0032501</a> | multicellular organismal process      | 4.78E-10              | 3.37E-7                   | 1.43 (16095,2807,1156,288)            |
| <a href="#">GO:0044707</a> | single-multicellular organism process | 5.21E-10              | 3.47E-7                   | 1.43 (16095,2749,1156,283)            |

|                            |                                                            |          |         |                            |
|----------------------------|------------------------------------------------------------|----------|---------|----------------------------|
| <a href="#">GO:0016043</a> | cellular component organization                            | 5.66E-10 | 3.57E-7 | 1.66 (16095,3536,398,145)  |
| <a href="#">GO:1902589</a> | single-organism organelle organization                     | 7.61E-10 | 4.56E-7 | 2.43 (16095,1161,353,62)   |
| <a href="#">GO:0071840</a> | cellular component organization or biogenesis              | 1.11E-9  | 6.33E-7 | 1.64 (16095,3567,398,145)  |
| <a href="#">GO:1902099</a> | regulation of metaphase/anaphase transition of cell cycle  | 1.19E-9  | 6.49E-7 | 12.63 (16095,41,373,12)    |
| <a href="#">GO:0030071</a> | regulation of mitotic metaphase/anaphase transition        | 1.19E-9  | 6.21E-7 | 12.63 (16095,41,373,12)    |
| <a href="#">GO:0044772</a> | mitotic cell cycle phase transition                        | 2.05E-9  | 1.03E-6 | 6.19 (16095,256,193,19)    |
| <a href="#">GO:0031577</a> | spindle checkpoint                                         | 2.12E-9  | 1.02E-6 | 14.12 (16095,37,339,11)    |
| <a href="#">GO:0044770</a> | cell cycle phase transition                                | 2.51E-9  | 1.16E-6 | 6.12 (16095,259,193,19)    |
| <a href="#">GO:0007346</a> | regulation of mitotic cell cycle                           | 3.36E-9  | 1.49E-6 | 4.49 (16095,328,273,25)    |
| <a href="#">GO:0044767</a> | single-organism developmental process                      | 3.67E-9  | 1.57E-6 | 1.39 (16095,3540,948,290)  |
| <a href="#">GO:0010948</a> | negative regulation of cell cycle process                  | 4.19E-9  | 1.73E-6 | 5.59 (16095,211,273,20)    |
| <a href="#">GO:0006996</a> | organelle organization                                     | 4.67E-9  | 1.87E-6 | 1.98 (16095,1777,398,87)   |
| <a href="#">GO:0071174</a> | mitotic spindle checkpoint                                 | 1.48E-8  | 5.72E-6 | 13.96 (16095,34,339,10)    |
| <a href="#">GO:0007059</a> | chromosome segregation                                     | 1.78E-8  | 6.66E-6 | 12.62 (16095,83,169,11)    |
| <a href="#">GO:0048856</a> | anatomical structure development                           | 1.81E-8  | 6.58E-6 | 1.48 (16095,2395,948,209)  |
| <a href="#">GO:0050896</a> | response to stimulus                                       | 3.38E-8  | 1.19E-5 | 1.23 (16095,5753,1197,525) |
| <a href="#">GO:0006928</a> | cellular component movement                                | 3.91E-8  | 1.34E-5 | 1.71 (16095,1150,980,120)  |
| <a href="#">GO:0006259</a> | DNA metabolic process                                      | 5.37E-8  | 1.79E-5 | 5.04 (16095,674,90,19)     |
| <a href="#">GO:0051983</a> | regulation of chromosome segregation                       | 5.59E-8  | 1.81E-5 | 14.54 (16095,27,369,9)     |
| <a href="#">GO:1901991</a> | negative regulation of mitotic cell cycle phase transition | 8.9E-8   | 2.81E-5 | 5.90 (16095,160,273,16)    |
| <a href="#">GO:0000226</a> | microtubule cytoskeleton organization                      | 1.07E-7  | 3.29E-5 | 3.05 (16095,212,796,32)    |
| <a href="#">GO:0007094</a> | mitotic spindle assembly checkpoint                        | 1.08E-7  | 3.23E-5 | 13.78 (16095,31,339,9)     |
| <a href="#">GO:0045839</a> | negative regulation of mitosis                             | 1.11E-7  | 3.24E-5 | 11.58 (16095,41,339,10)    |
| <a href="#">GO:0051784</a> | negative regulation of nuclear division                    | 1.11E-7  | 3.17E-5 | 11.58 (16095,41,339,10)    |
| <a href="#">GO:1901988</a> | negative regulation of cell cycle phase transition         | 1.17E-7  | 3.26E-5 | 5.79 (16095,163,273,16)    |

|                            |                                                                    |         |         |                            |
|----------------------------|--------------------------------------------------------------------|---------|---------|----------------------------|
| <a href="#">GO:0000086</a> | G2/M transition of mitotic cell cycle                              | 1.27E-7 | 3.47E-5 | 15.28 (16095,120,79,9)     |
| <a href="#">GO:0007093</a> | mitotic cell cycle checkpoint                                      | 1.31E-7 | 3.5E-5  | 8.96 (16095,79,273,12)     |
| <a href="#">GO:0071173</a> | spindle assembly checkpoint                                        | 1.48E-7 | 3.87E-5 | 13.35 (16095,32,339,9)     |
| <a href="#">GO:0042127</a> | regulation of cell proliferation                                   | 1.64E-7 | 4.19E-5 | 1.80 (16095,1205,704,95)   |
| <a href="#">GO:1901990</a> | regulation of mitotic cell cycle phase transition                  | 1.9E-7  | 4.73E-5 | 4.94 (16095,215,273,18)    |
| <a href="#">GO:0030855</a> | epithelial cell differentiation                                    | 1.97E-7 | 4.83E-5 | 2.67 (16095,248,924,38)    |
| <a href="#">GO:1902100</a> | negative regulation of metaphase/anaphase transition of cell cycle | 1.98E-7 | 4.75E-5 | 12.95 (16095,33,339,9)     |
| <a href="#">GO:0045841</a> | negative regulation of mitotic metaphase/anaphase transition       | 1.98E-7 | 4.66E-5 | 12.95 (16095,33,339,9)     |
| <a href="#">GO:1901987</a> | regulation of cell cycle phase transition                          | 2.75E-7 | 6.34E-5 | 4.85 (16095,219,273,18)    |
| <a href="#">GO:0006333</a> | chromatin assembly or disassembly                                  | 4.51E-7 | 1.02E-4 | 7.45 (16095,44,589,12)     |
| <a href="#">GO:0031055</a> | chromatin remodeling at centromere                                 | 5.23E-7 | 1.16E-4 | 10.69 (16095,23,589,9)     |
| <a href="#">GO:0007010</a> | cytoskeleton organization                                          | 5.34E-7 | 1.16E-4 | 2.12 (16095,545,807,58)    |
| <a href="#">GO:0051052</a> | regulation of DNA metabolic process                                | 5.96E-7 | 1.28E-4 | 4.87 (16095,234,240,17)    |
| <a href="#">GO:0007017</a> | microtubule-based process                                          | 6.56E-7 | 1.38E-4 | 2.89 (16095,377,472,32)    |
| <a href="#">GO:0051128</a> | regulation of cellular component organization                      | 7.22E-7 | 1.49E-4 | 1.46 (16095,1399,1449,184) |
| <a href="#">GO:0006260</a> | DNA replication                                                    | 8.89E-7 | 1.81E-4 | 6.97 (16095,169,164,12)    |
| <a href="#">GO:0008283</a> | cell proliferation                                                 | 9.86E-7 | 1.97E-4 | 2.23 (16095,576,627,50)    |
| <a href="#">GO:0009987</a> | cellular process                                                   | 1.37E-6 | 2.69E-4 | 1.16 (16095,11818,365,310) |
| <a href="#">GO:0007051</a> | spindle organization                                               | 1.45E-6 | 2.8E-4  | 5.75 (16095,69,568,14)     |
| <a href="#">GO:0034724</a> | DNA replication-independent nucleosome organization                | 1.75E-6 | 3.34E-4 | 6.25 (16095,21,1348,11)    |
| <a href="#">GO:0034080</a> | CENP-A containing nucleosome assembly at centromere                | 1.75E-6 | 3.29E-4 | 6.25 (16095,21,1348,11)    |
| <a href="#">GO:0006336</a> | DNA replication-independent nucleosome assembly                    | 1.75E-6 | 3.24E-4 | 6.25 (16095,21,1348,11)    |
| <a href="#">GO:0090068</a> | positive regulation of cell cycle process                          | 1.78E-6 | 3.23E-4 | 6.59 (16095,188,156,12)    |

|                            |                                                |         |         |                            |
|----------------------------|------------------------------------------------|---------|---------|----------------------------|
| <a href="#">GO:0010639</a> | negative regulation of organelle organization  | 1.9E-6  | 3.4E-4  | 3.99 (16095,188,408,19)    |
| <a href="#">GO:0008544</a> | epidermis development                          | 2.28E-6 | 4.02E-4 | 2.84 (16095,106,1549,29)   |
| <a href="#">GO:0043146</a> | spindle stabilization                          | 3.18E-6 | 5.53E-4 | 83.39 (16095,3,193,3)      |
| <a href="#">GO:0031570</a> | DNA integrity checkpoint                       | 4.17E-6 | 7.15E-4 | 5.81 (16095,79,456,13)     |
| <a href="#">GO:0032465</a> | regulation of cytokinesis                      | 4.6E-6  | 7.77E-4 | 13.96 (16095,30,269,7)     |
| <a href="#">GO:0051782</a> | negative regulation of cell division           | 4.94E-6 | 8.23E-4 | 22.06 (16095,8,456,5)      |
| <a href="#">GO:0065009</a> | regulation of molecular function               | 5.25E-6 | 8.62E-4 | 6.55 (16095,2010,11,9)     |
| <a href="#">GO:0032466</a> | negative regulation of cytokinesis             | 5.58E-6 | 9.05E-4 | 69.98 (16095,3,230,3)      |
| <a href="#">GO:0007155</a> | cell adhesion                                  | 6.63E-6 | 1.06E-3 | 1.51 (16095,759,1820,130)  |
| <a href="#">GO:0008284</a> | positive regulation of cell proliferation      | 6.78E-6 | 1.07E-3 | 2.38 (16095,671,383,38)    |
| <a href="#">GO:0051716</a> | cellular response to stimulus                  | 6.98E-6 | 1.09E-3 | 1.18 (16095,4524,1802,598) |
| <a href="#">GO:0051239</a> | regulation of multicellular organismal process | 7.05E-6 | 1.08E-3 | 1.31 (16095,1857,1837,278) |
| <a href="#">GO:0022610</a> | biological adhesion                            | 7.97E-6 | 1.21E-3 | 1.51 (16095,761,1820,130)  |
| <a href="#">GO:0050793</a> | regulation of developmental process            | 8.77E-6 | 1.31E-3 | 1.34 (16095,1562,1837,239) |
| <a href="#">GO:0051276</a> | chromosome organization                        | 9.7E-6  | 1.44E-3 | 4.49 (16095,640,84,15)     |

Species used: Homo sapiens

The system has recognized 18524 genes out of 19804 gene terms entered by the user. 18522 genes were recognized by gene symbol and 2 genes by other gene IDs . 47 duplicate genes were removed (keeping the highest ranking instance of each gene) leaving a total of 18477 genes. Only 16095 of these genes are associated with a GO term.

'P-value' is the enrichment p-value computed according to the mHG or HG model. This p-value is not corrected for multiple testing of 11988 GO terms. 'FDR q-value' is the correction of the above p-value for multiple testing using the Benjamini and Hochberg (1995) method.

Namely, for the  $i$ th term (ranked according to p-value) the FDR q-value is  $(p\text{-value} * \text{number of GO terms}) / i$ .

Enrichment  $(N, B, n, b)$  is defined as follows:

$N$  - is the total number of genes

$B$  - is the total number of genes associated with a specific GO term

$n$  - is the number of genes in the top of the user's input list or in the target set when appropriate

$b$  - is the number of genes in the intersection

Enrichment =  $(b/n) / (B/N)$ .
