# Supplementary material for: Identification of Logic Relationships between Genes and Subtypes of Non-Small Cell Lung Cancer
Source: PubMed Central journal article supplement (PMC3990524; doi:10.1371/journal.pone.0094644), 2014-04-17
Supplement: pone.0094644.s004.pdf [file pone.0094644.s004.pdf]

Supporting Information -Table S1: List of probe-AC lower and higher logic relationships identified in this paper.

Table A 274 probe-AC lower logic relationships

| Probe          | Probe-subtype coefficient | Subtype-probe coefficient | Type |
|----------------|---------------------------|---------------------------|------|
| '1552487_a_at' | 0.61                      | 0.61                      | 2    |
| '1552543_a_at' | 0.22                      | 0.25                      | 2    |
| '1552834_at'   | 0.28                      | 0.33                      | 1    |
| '1553158_at'   | 0.25                      | 0.25                      | 2    |
| '1553169_at'   | 0.21                      | 0.26                      | 1    |
| '1553171_x_at' | 0.28                      | 0.28                      | 1    |
| '1553295_at'   | 0.29                      | 0.29                      | 2    |
| '1553705_a_at' | 0.33                      | 0.34                      | 2    |
| '1553938_a_at' | 0.36                      | 0.36                      | 1    |
| '1554050_at'   | 0.31                      | 0.31                      | 1    |
| '1554246_at'   | 0.33                      | 0.34                      | 1    |
| '1554252_a_at' | 0.49                      | 0.51                      | 2    |
| '1554253_a_at' | 0.24                      | 0.24                      | 2    |
| '1554586_a_at' | 0.20                      | 0.22                      | 1    |
| '1555203_s_at' | 0.23                      | 0.23                      | 1    |
| '1555581_a_at' | 0.31                      | 0.38                      | 2    |
| '1555942_a_at' | 0.31                      | 0.35                      | 2    |
| '1555962_at'   | 0.24                      | 0.25                      | 1    |
| '1555993_at'   | 0.18                      | 0.23                      | 1    |
| '1556012_at'   | 0.26                      | 0.27                      | 1    |
| '1556793_a_at' | 0.38                      | 0.40                      | 2    |
| '1557918_s_at' | 0.38                      | 0.40                      | 2    |
| '1558815_at'   | 0.20                      | 0.22                      | 1    |
| '1559606_at'   | 0.38                      | 0.38                      | 2    |
| '1559607_s_at' | 0.43                      | 0.44                      | 2    |
| '1559633_a_at' | 0.32                      | 0.32                      | 2    |
| '1560407_at'   | 0.26                      | 0.29                      | 2    |
| '1563805_a_at' | 0.18                      | 0.25                      | 2    |
| '1563900_at'   | 0.42                      | 0.43                      | 2    |
| '1564307_a_at' | 0.40                      | 0.41                      | 2    |
| '1565936_a_at' | 0.30                      | 0.31                      | 1    |
| '1565937_a_at' | 0.24                      | 0.29                      | 1    |
| '1566140_at'   | 0.34                      | 0.38                      | 1    |
| '1569203_at'   | 0.24                      | 0.24                      | 1    |
| '1569688_at'   | 0.19                      | 0.25                      | 1    |
| '201249_at'    | 0.31                      | 0.31                      | 2    |
| '201710_at'    | 0.19                      | 0.23                      | 2    |

|               |      |      |   |
|---------------|------|------|---|
| '201820_at'   | 0.68 | 0.68 | 2 |
| '202094_at'   | 0.23 | 0.31 | 2 |
| '202235_at'   | 0.23 | 0.25 | 2 |
| '202504_at'   | 0.29 | 0.35 | 2 |
| '202755_s_at' | 0.35 | 0.35 | 2 |
| '203365_s_at' | 0.30 | 0.32 | 1 |
| '203691_at'   | 0.32 | 0.34 | 2 |
| '203716_s_at' | 0.22 | 0.23 | 1 |
| '203797_at'   | 0.24 | 0.28 | 2 |
| '203953_s_at' | 0.35 | 0.37 | 1 |
| '204603_at'   | 0.19 | 0.28 | 2 |
| '204614_at'   | 0.43 | 0.43 | 2 |
| '204855_at'   | 0.31 | 0.35 | 2 |
| '204948_s_at' | 0.20 | 0.25 | 2 |
| '204952_at'   | 0.33 | 0.33 | 2 |
| '205064_at'   | 0.30 | 0.32 | 2 |
| '205102_at'   | 0.25 | 0.29 | 1 |
| '205109_s_at' | 0.29 | 0.31 | 2 |
| '205186_at'   | 0.33 | 0.34 | 1 |
| '205216_s_at' | 0.30 | 0.31 | 1 |
| '205309_at'   | 0.49 | 0.50 | 1 |
| '205313_at'   | 0.40 | 0.40 | 1 |
| '205432_at'   | 0.19 | 0.24 | 1 |
| '205490_x_at' | 0.33 | 0.33 | 2 |
| '205595_at'   | 0.66 | 0.66 | 2 |
| '205614_x_at' | 0.21 | 0.23 | 1 |
| '205637_s_at' | 0.31 | 0.32 | 2 |
| '205640_at'   | 0.25 | 0.27 | 1 |
| '205646_s_at' | 0.20 | 0.28 | 2 |
| '205724_at'   | 0.57 | 0.57 | 2 |
| '205894_at'   | 0.26 | 0.26 | 1 |
| '205916_at'   | 0.35 | 0.35 | 2 |
| '205942_s_at' | 0.25 | 0.25 | 1 |
| '206008_at'   | 0.18 | 0.28 | 2 |
| '206032_at'   | 0.35 | 0.38 | 2 |
| '206033_s_at' | 0.52 | 0.52 | 2 |
| '206046_at'   | 0.54 | 0.55 | 2 |
| '206122_at'   | 0.43 | 0.44 | 2 |
| '206156_at'   | 0.66 | 0.66 | 2 |
| '206164_at'   | 0.59 | 0.59 | 2 |
| '206165_s_at' | 0.38 | 0.39 | 2 |
| '206166_s_at' | 0.68 | 0.68 | 2 |
| '206307_s_at' | 0.37 | 0.37 | 2 |

|               |      |      |   |
|---------------|------|------|---|
| '206458_s_at' | 0.33 | 0.35 | 2 |
| '206459_s_at' | 0.19 | 0.22 | 2 |
| '206581_at'   | 0.43 | 0.43 | 2 |
| '206677_at'   | 0.27 | 0.30 | 2 |
| '206751_s_at' | 0.19 | 0.28 | 2 |
| '206912_at'   | 0.24 | 0.26 | 2 |
| '207206_s_at' | 0.27 | 0.27 | 2 |
| '207345_at'   | 0.19 | 0.24 | 2 |
| '207382_at'   | 0.51 | 0.51 | 2 |
| '207397_s_at' | 0.20 | 0.28 | 2 |
| '207455_at'   | 0.19 | 0.22 | 2 |
| '207602_at'   | 0.38 | 0.42 | 2 |
| '207675_x_at' | 0.22 | 0.28 | 2 |
| '207837_at'   | 0.25 | 0.25 | 1 |
| '207935_s_at' | 0.42 | 0.43 | 2 |
| '207949_s_at' | 0.24 | 0.29 | 1 |
| '208153_s_at' | 0.54 | 0.55 | 2 |
| '208209_s_at' | 0.19 | 0.26 | 1 |
| '208502_s_at' | 0.27 | 0.29 | 2 |
| '208539_x_at' | 0.37 | 0.37 | 2 |
| '208600_s_at' | 0.28 | 0.32 | 1 |
| '209125_at'   | 0.28 | 0.33 | 2 |
| '209126_x_at' | 0.55 | 0.56 | 2 |
| '209351_at'   | 0.38 | 0.38 | 2 |
| '209504_s_at' | 0.28 | 0.31 | 1 |
| '209587_at'   | 0.29 | 0.31 | 2 |
| '209590_at'   | 0.33 | 0.33 | 2 |
| '209591_s_at' | 0.32 | 0.32 | 2 |
| '209719_x_at' | 0.18 | 0.22 | 2 |
| '209720_s_at' | 0.27 | 0.29 | 2 |
| '209800_at'   | 0.41 | 0.41 | 2 |
| '210020_x_at' | 0.26 | 0.27 | 2 |
| '210237_at'   | 0.29 | 0.33 | 2 |
| '210505_at'   | 0.40 | 0.40 | 2 |
| '210521_s_at' | 0.27 | 0.35 | 2 |
| '210673_x_at' | 0.51 | 0.51 | 1 |
| '210721_s_at' | 0.28 | 0.33 | 2 |
| '210945_at'   | 0.31 | 0.33 | 2 |
| '211002_s_at' | 0.59 | 0.59 | 2 |
| '211194_s_at' | 0.51 | 0.51 | 2 |
| '211195_s_at' | 0.27 | 0.36 | 2 |
| '211259_s_at' | 0.21 | 0.24 | 2 |
| '211361_s_at' | 0.63 | 0.63 | 2 |

|               |      |      |   |
|---------------|------|------|---|
| '211362_s_at' | 0.40 | 0.40 | 2 |
| '211401_s_at' | 0.29 | 0.29 | 2 |
| '211473_s_at' | 0.20 | 0.30 | 2 |
| '211834_s_at' | 0.42 | 0.43 | 2 |
| '211906_s_at' | 0.28 | 0.28 | 2 |
| '212478_at'   | 0.25 | 0.25 | 2 |
| '213308_at'   | 0.21 | 0.25 | 1 |
| '213441_x_at' | 0.23 | 0.25 | 1 |
| '213533_at'   | 0.18 | 0.23 | 2 |
| '213680_at'   | 0.46 | 0.47 | 2 |
| '213707_s_at' | 0.36 | 0.36 | 2 |
| '213722_at'   | 0.26 | 0.28 | 2 |
| '213796_at'   | 0.38 | 0.38 | 2 |
| '213820_s_at' | 0.32 | 0.32 | 2 |
| '213990_s_at' | 0.22 | 0.31 | 2 |
| '213992_at'   | 0.38 | 0.38 | 2 |
| '214549_x_at' | 0.31 | 0.32 | 2 |
| '214595_at'   | 0.23 | 0.27 | 2 |
| '214596_at'   | 0.33 | 0.33 | 2 |
| '214639_s_at' | 0.25 | 0.26 | 2 |
| '214641_at'   | 0.29 | 0.34 | 1 |
| '214680_at'   | 0.35 | 0.41 | 2 |
| '214846_s_at' | 0.27 | 0.29 | 1 |
| '215300_s_at' | 0.44 | 0.45 | 1 |
| '215559_at'   | 0.29 | 0.34 | 1 |
| '215563_s_at' | 0.28 | 0.33 | 1 |
| '215724_at'   | 0.25 | 0.31 | 2 |
| '216258_s_at' | 0.50 | 0.52 | 2 |
| '216488_s_at' | 0.42 | 0.42 | 1 |
| '216705_s_at' | 0.21 | 0.23 | 2 |
| '216918_s_at' | 0.69 | 0.69 | 2 |
| '217040_x_at' | 0.20 | 0.28 | 2 |
| '217272_s_at' | 0.57 | 0.57 | 2 |
| '217305_s_at' | 0.19 | 0.24 | 2 |
| '217312_s_at' | 0.45 | 0.45 | 2 |
| '217528_at'   | 0.60 | 0.60 | 2 |
| '218553_s_at' | 0.20 | 0.23 | 2 |
| '218629_at'   | 0.24 | 0.25 | 2 |
| '218657_at'   | 0.28 | 0.33 | 2 |
| '218832_x_at' | 0.30 | 0.31 | 1 |
| '218931_at'   | 0.26 | 0.26 | 1 |
| '218990_s_at' | 0.31 | 0.31 | 2 |
| '219227_at'   | 0.24 | 0.24 | 1 |

|               |      |      |   |
|---------------|------|------|---|
| '219498_s_at' | 0.25 | 0.27 | 2 |
| '219511_s_at' | 0.21 | 0.22 | 2 |
| '219536_s_at' | 0.29 | 0.31 | 2 |
| '219545_at'   | 0.24 | 0.27 | 1 |
| '219554_at'   | 0.24 | 0.28 | 2 |
| '219855_at'   | 0.33 | 0.35 | 2 |
| '219936_s_at' | 0.22 | 0.24 | 2 |
| '220009_at'   | 0.26 | 0.28 | 1 |
| '220026_at'   | 0.26 | 0.31 | 2 |
| '220102_at'   | 0.30 | 0.34 | 2 |
| '220108_at'   | 0.25 | 0.28 | 1 |
| '220198_s_at' | 0.30 | 0.30 | 2 |
| '220296_at'   | 0.22 | 0.27 | 1 |
| '220393_at'   | 0.31 | 0.31 | 1 |
| '220559_at'   | 0.22 | 0.24 | 2 |
| '220622_at'   | 0.27 | 0.33 | 1 |
| '220751_s_at' | 0.22 | 0.26 | 1 |
| '220816_at'   | 0.33 | 0.33 | 2 |
| '221291_at'   | 0.38 | 0.39 | 2 |
| '221779_at'   | 0.27 | 0.28 | 2 |
| '221795_at'   | 0.39 | 0.39 | 2 |
| '221796_at'   | 0.23 | 0.26 | 2 |
| '221854_at'   | 0.49 | 0.49 | 2 |
| '222678_s_at' | 0.18 | 0.26 | 2 |
| '222892_s_at' | 0.40 | 0.41 | 2 |
| '222938_x_at' | 0.23 | 0.23 | 1 |
| '223232_s_at' | 0.19 | 0.24 | 1 |
| '223694_at'   | 0.29 | 0.29 | 2 |
| '223832_s_at' | 0.34 | 0.35 | 2 |
| '224204_x_at' | 0.27 | 0.30 | 2 |
| '224209_s_at' | 0.26 | 0.28 | 2 |
| '224328_s_at' | 0.25 | 0.29 | 2 |
| '224394_at'   | 0.20 | 0.27 | 2 |
| '224397_s_at' | 0.20 | 0.26 | 2 |
| '224458_at'   | 0.23 | 0.29 | 2 |
| '225211_at'   | 0.49 | 0.49 | 2 |
| '225531_at'   | 0.19 | 0.21 | 1 |
| '225822_at'   | 0.20 | 0.28 | 1 |
| '226553_at'   | 0.28 | 0.28 | 1 |
| '226570_at'   | 0.27 | 0.29 | 2 |
| '226755_at'   | 0.57 | 0.57 | 2 |
| '226891_at'   | 0.25 | 0.28 | 2 |
| '226973_at'   | 0.37 | 0.37 | 1 |

|               |      |      |   |
|---------------|------|------|---|
| '227226_at'   | 0.33 | 0.33 | 2 |
| '227282_at'   | 0.33 | 0.33 | 2 |
| '227429_at'   | 0.27 | 0.27 | 1 |
| '227735_s_at' | 0.32 | 0.36 | 2 |
| '227736_at'   | 0.34 | 0.38 | 2 |
| '228375_at'   | 0.37 | 0.38 | 2 |
| '228806_at'   | 0.50 | 0.50 | 1 |
| '228877_at'   | 0.46 | 0.49 | 1 |
| '228969_at'   | 0.21 | 0.24 | 1 |
| '229030_at'   | 0.19 | 0.26 | 1 |
| '229105_at'   | 0.37 | 0.41 | 1 |
| '229178_at'   | 0.27 | 0.28 | 1 |
| '229245_at'   | 0.37 | 0.39 | 1 |
| '229290_at'   | 0.48 | 0.48 | 2 |
| '229372_at'   | 0.53 | 0.53 | 1 |
| '229385_s_at' | 0.20 | 0.20 | 2 |
| '229463_at'   | 0.27 | 0.34 | 2 |
| '229599_at'   | 0.25 | 0.25 | 1 |
| '229761_at'   | 0.23 | 0.23 | 2 |
| '230021_at'   | 0.21 | 0.21 | 2 |
| '230087_at'   | 0.24 | 0.24 | 2 |
| '230134_s_at' | 0.23 | 0.23 | 2 |
| '230398_at'   | 0.28 | 0.28 | 2 |
| '230464_at'   | 0.61 | 0.62 | 2 |
| '230835_at'   | 0.22 | 0.32 | 2 |
| '231070_at'   | 0.19 | 0.25 | 1 |
| '231430_at'   | 0.29 | 0.33 | 2 |
| '231771_at'   | 0.40 | 0.41 | 2 |
| '231800_s_at' | 0.25 | 0.26 | 2 |
| '231867_at'   | 0.42 | 0.42 | 2 |
| '231928_at'   | 0.36 | 0.37 | 2 |
| '232082_x_at' | 0.39 | 0.39 | 2 |
| '232116_at'   | 0.36 | 0.36 | 2 |
| '232263_at'   | 0.26 | 0.28 | 2 |
| '232553_at'   | 0.24 | 0.30 | 2 |
| '232602_at'   | 0.25 | 0.27 | 1 |
| '232765_x_at' | 0.32 | 0.34 | 1 |
| '233294_at'   | 0.24 | 0.27 | 2 |
| '233801_s_at' | 0.19 | 0.29 | 2 |
| '233882_s_at' | 0.26 | 0.29 | 2 |
| '234700_s_at' | 0.28 | 0.36 | 2 |
| '235075_at'   | 0.61 | 0.61 | 2 |
| '235269_at'   | 0.28 | 0.28 | 2 |

|               |      |      |   |
|---------------|------|------|---|
| '235272_at'   | 0.23 | 0.26 | 2 |
| '235795_at'   | 0.36 | 0.37 | 2 |
| '235852_at'   | 0.20 | 0.23 | 2 |
| '236083_at'   | 0.19 | 0.29 | 1 |
| '236095_at'   | 0.44 | 0.46 | 2 |
| '236098_at'   | 0.20 | 0.25 | 1 |
| '236681_at'   | 0.24 | 0.26 | 2 |
| '236741_at'   | 0.26 | 0.27 | 2 |
| '236979_at'   | 0.28 | 0.29 | 1 |
| '238419_at'   | 0.28 | 0.28 | 2 |
| '238811_at'   | 0.18 | 0.25 | 2 |
| '239309_at'   | 0.27 | 0.27 | 2 |
| '240353_s_at' | 0.33 | 0.35 | 2 |
| '240354_at'   | 0.18 | 0.22 | 2 |
| '241459_at'   | 0.26 | 0.26 | 1 |
| '242138_at'   | 0.30 | 0.34 | 2 |
| '242204_at'   | 0.27 | 0.27 | 2 |
| '242940_x_at' | 0.24 | 0.25 | 2 |
| '243623_at'   | 0.18 | 0.28 | 1 |
| '243681_at'   | 0.26 | 0.26 | 1 |
| '244056_at'   | 0.20 | 0.27 | 1 |
| '244463_at'   | 0.56 | 0.56 | 2 |

Table B 170 probe-AC higher logic relationships

| Probe1         | Probe2         | Coefficient<br>(probe1,probe2-subtype) | Coefficient<br>(subtype-probe1,probe2) | Type |
|----------------|----------------|----------------------------------------|----------------------------------------|------|
| '1552478_a_at' | '1552496_a_at' | 0.30                                   | 0.31                                   | 6_2  |
| '1552478_a_at' | '208608_s_at'  | 0.33                                   | 0.35                                   | 6_2  |
| '1552478_a_at' | '210738_s_at'  | 0.33                                   | 0.34                                   | 6_2  |
| '1552478_a_at' | '214708_at'    | 0.33                                   | 0.36                                   | 6_2  |
| '1552478_a_at' | '234305_s_at'  | 0.31                                   | 0.31                                   | 2    |
| '1552478_a_at' | '235248_at'    | 0.31                                   | 0.33                                   | 6_2  |
| '1552496_a_at' | '1554835_a_at' | 0.30                                   | 0.30                                   | 6_1  |
| '1552496_a_at' | '205348_s_at'  | 0.31                                   | 0.31                                   | 6_1  |
| '1552496_a_at' | '205701_at'    | 0.30                                   | 0.31                                   | 6_1  |
| '1552496_a_at' | '244321_at'    | 0.34                                   | 0.34                                   | 6_1  |
| '1552665_at'   | '1555772_a_at' | 0.32                                   | 0.34                                   | 6_1  |
| '1552665_at'   | '206941_x_at'  | 0.31                                   | 0.35                                   | 3    |
| '1553183_at'   | '203438_at'    | 0.31                                   | 0.31                                   | 6_1  |
| '1553183_at'   | '230682_x_at'  | 0.31                                   | 0.32                                   | 3    |

|                |                |      |      |     |
|----------------|----------------|------|------|-----|
| '1553423_a_at' | '235486_at'    | 0.31 | 0.31 | 5_1 |
| '1553454_at'   | '214254_at'    | 0.31 | 0.31 | 4   |
| '1553604_at'   | '214708_at'    | 0.30 | 0.32 | 6_2 |
| '1553654_at'   | '243021_at'    | 0.30 | 0.31 | 5_2 |
| '1554062_at'   | '205506_at'    | 0.31 | 0.31 | 6_2 |
| '1554062_at'   | '228912_at'    | 0.31 | 0.32 | 6_2 |
| '1554835_a_at' | '202756_s_at'  | 0.33 | 0.33 | 2   |
| '1554835_a_at' | '206290_s_at'  | 0.33 | 0.33 | 6_2 |
| '1554835_a_at' | '234305_s_at'  | 0.30 | 0.30 | 2   |
| '1554912_at'   | '227578_at'    | 0.30 | 0.36 | 5_1 |
| '1554960_at'   | '235486_at'    | 0.30 | 0.31 | 4   |
| '1555006_at'   | '1557675_at'   | 0.30 | 0.31 | 5_2 |
| '1555006_at'   | '1563498_s_at' | 0.32 | 0.33 | 5_2 |
| '1555006_at'   | '220414_at'    | 0.31 | 0.32 | 4   |
| '1555383_a_at' | '235486_at'    | 0.31 | 0.32 | 4   |
| '1556476_at'   | '206010_at'    | 0.30 | 0.31 | 5_2 |
| '1557474_at'   | '205649_s_at'  | 0.31 | 0.32 | 3   |
| '1558523_at'   | '228463_at'    | 0.31 | 0.32 | 3   |
| '1562697_at'   | '244321_at'    | 0.32 | 0.32 | 6_1 |
| '1569886_a_at' | '205506_at'    | 0.33 | 0.33 | 3   |
| '1569886_a_at' | '205649_s_at'  | 0.31 | 0.32 | 3   |
| '1569886_a_at' | '228463_at'    | 0.33 | 0.34 | 3   |
| '1570032_at'   | '209277_at'    | 0.31 | 0.31 | 5_2 |
| '1570032_at'   | '230863_at'    | 0.31 | 0.31 | 5_2 |
| '1570032_at'   | '238962_at'    | 0.31 | 0.31 | 5_2 |
| '201474_s_at'  | '223779_at'    | 0.30 | 0.30 | 1   |
| '202756_s_at'  | '214486_x_at'  | 0.33 | 0.33 | 6_2 |
| '202756_s_at'  | '230682_x_at'  | 0.31 | 0.32 | 6_2 |
| '202756_s_at'  | '235287_at'    | 0.31 | 0.31 | 2   |
| '202831_at'    | '204973_at'    | 0.33 | 0.33 | 6_2 |
| '202831_at'    | '205649_s_at'  | 0.36 | 0.36 | 6_2 |
| '202831_at'    | '205650_s_at'  | 0.34 | 0.34 | 6_2 |
| '202831_at'    | '211488_s_at'  | 0.31 | 0.31 | 2   |
| '202831_at'    | '222712_s_at'  | 0.31 | 0.31 | 6_2 |
| '202831_at'    | '228463_at'    | 0.33 | 0.33 | 6_2 |
| '202831_at'    | '232109_at'    | 0.31 | 0.31 | 6_2 |
| '202831_at'    | '244353_s_at'  | 0.32 | 0.32 | 2   |
| '203438_at'    | '205649_s_at'  | 0.31 | 0.31 | 6_2 |
| '203438_at'    | '205650_s_at'  | 0.30 | 0.31 | 6_2 |
| '203438_at'    | '209441_at'    | 0.32 | 0.33 | 6_2 |
| '203438_at'    | '224476_s_at'  | 0.30 | 0.38 | 6_1 |
| '203798_s_at'  | '205649_s_at'  | 0.31 | 0.32 | 6_2 |
| '203798_s_at'  | '214486_x_at'  | 0.30 | 0.30 | 6_2 |

|               |               |      |      |     |
|---------------|---------------|------|------|-----|
| '203798_s_at' | '214708_at'   | 0.35 | 0.36 | 6_2 |
| '203798_s_at' | '225130_at'   | 0.34 | 0.34 | 6_2 |
| '203798_s_at' | '230349_at'   | 0.30 | 0.32 | 6_2 |
| '203798_s_at' | '239178_at'   | 0.30 | 0.30 | 6_2 |
| '204471_at'   | '219727_at'   | 0.32 | 0.35 | 2   |
| '204492_at'   | '205506_at'   | 0.30 | 0.30 | 6_2 |
| '204492_at'   | '228912_at'   | 0.33 | 0.33 | 6_2 |
| '204654_s_at' | '209699_x_at' | 0.31 | 0.31 | 2   |
| '204654_s_at' | '210347_s_at' | 0.31 | 0.32 | 2   |
| '204654_s_at' | '219998_at'   | 0.31 | 0.31 | 2   |
| '204654_s_at' | '224555_x_at' | 0.30 | 0.30 | 6_2 |
| '204654_s_at' | '230682_x_at' | 0.34 | 0.34 | 6_2 |
| '204934_s_at' | '214254_at'   | 0.30 | 0.31 | 5_1 |
| '204973_at'   | '209699_x_at' | 0.33 | 0.33 | 6_1 |
| '204973_at'   | '219727_at'   | 0.31 | 0.31 | 6_1 |
| '204989_s_at' | '229400_at'   | 0.30 | 0.31 | 2   |
| '204989_s_at' | '230682_x_at' | 0.32 | 0.34 | 6_2 |
| '205085_at'   | '219727_at'   | 0.31 | 0.31 | 2   |
| '205157_s_at' | '232109_at'   | 0.32 | 0.33 | 6_2 |
| '205253_at'   | '219926_at'   | 0.30 | 0.31 | 4   |
| '205253_at'   | '220322_at'   | 0.31 | 0.32 | 4   |
| '205253_at'   | '224329_s_at' | 0.30 | 0.30 | 4   |
| '205253_at'   | '235486_at'   | 0.32 | 0.34 | 4   |
| '205268_s_at' | '220414_at'   | 0.30 | 0.31 | 4   |
| '205348_s_at' | '205649_s_at' | 0.31 | 0.31 | 6_2 |
| '205388_at'   | '205650_s_at' | 0.31 | 0.31 | 3   |
| '205388_at'   | '206290_s_at' | 0.32 | 0.32 | 3   |
| '205388_at'   | '233720_at'   | 0.31 | 0.32 | 3   |
| '205388_at'   | '235486_at'   | 0.30 | 0.31 | 6_1 |
| '205506_at'   | '216898_s_at' | 0.30 | 0.30 | 3   |
| '205649_s_at' | '209699_x_at' | 0.30 | 0.31 | 6_1 |
| '205649_s_at' | '214240_at'   | 0.31 | 0.31 | 6_1 |
| '205649_s_at' | '230682_x_at' | 0.33 | 0.34 | 3   |
| '206290_s_at' | '214486_x_at' | 0.30 | 0.30 | 3   |
| '206290_s_at' | '230682_x_at' | 0.32 | 0.33 | 3   |
| '206300_s_at' | '206859_s_at' | 0.32 | 0.32 | 6_2 |
| '206300_s_at' | '208106_x_at' | 0.30 | 0.30 | 6_2 |
| '206300_s_at' | '210728_s_at' | 0.33 | 0.35 | 7   |
| '206300_s_at' | '214708_at'   | 0.31 | 0.31 | 6_2 |
| '206300_s_at' | '217495_x_at' | 0.31 | 0.33 | 7   |
| '206300_s_at' | '219727_at'   | 0.33 | 0.33 | 2   |
| '206300_s_at' | '224156_x_at' | 0.32 | 0.33 | 6_2 |
| '206300_s_at' | '225130_at'   | 0.30 | 0.30 | 6_2 |

|               |               |      |      |     |
|---------------|---------------|------|------|-----|
| '206300_s_at' | '228463_at'   | 0.36 | 0.36 | 6_2 |
| '206300_s_at' | '228625_at'   | 0.31 | 0.31 | 2   |
| '206300_s_at' | '228912_at'   | 0.33 | 0.33 | 6_2 |
| '206343_s_at' | '214774_x_at' | 0.30 | 0.31 | 5_2 |
| '206343_s_at' | '215108_x_at' | 0.30 | 0.31 | 5_2 |
| '206343_s_at' | '216623_x_at' | 0.31 | 0.31 | 5_2 |
| '206343_s_at' | '229177_at'   | 0.30 | 0.30 | 5_2 |
| '206343_s_at' | '243021_at'   | 0.32 | 0.33 | 5_2 |
| '206505_at'   | '230682_x_at' | 0.33 | 0.33 | 3   |
| '206515_at'   | '206941_x_at' | 0.31 | 0.32 | 6_2 |
| '206941_x_at' | '219727_at'   | 0.32 | 0.33 | 6_1 |
| '206941_x_at' | '244321_at'   | 0.31 | 0.31 | 6_1 |
| '207307_at'   | '235486_at'   | 0.30 | 0.31 | 4   |
| '209441_at'   | '225094_at'   | 0.30 | 0.31 | 6_1 |
| '209618_at'   | '230682_x_at' | 0.31 | 0.31 | 3   |
| '209985_s_at' | '230682_x_at' | 0.32 | 0.32 | 3   |
| '210008_s_at' | '228802_at'   | 0.30 | 0.31 | 6_2 |
| '210103_s_at' | '219727_at'   | 0.31 | 0.31 | 6_1 |
| '210192_at'   | '224555_x_at' | 0.30 | 0.30 | 3   |
| '210272_at'   | '214254_at'   | 0.31 | 0.31 | 5_1 |
| '210272_at'   | '220262_s_at' | 0.32 | 0.32 | 5_1 |
| '210727_at'   | '230682_x_at' | 0.36 | 0.36 | 3   |
| '210728_s_at' | '230682_x_at' | 0.33 | 0.33 | 3   |
| '210906_x_at' | '233198_at'   | 0.30 | 0.30 | 1   |
| '211121_s_at' | '235486_at'   | 0.30 | 0.31 | 5_1 |
| '212823_s_at' | '230822_at'   | 0.34 | 0.35 | 6_2 |
| '212823_s_at' | '235287_at'   | 0.31 | 0.31 | 2   |
| '212823_s_at' | '238878_at'   | 0.32 | 0.32 | 6_2 |
| '212823_s_at' | '240282_at'   | 0.31 | 0.33 | 6_2 |
| '213432_at'   | '243116_at'   | 0.32 | 0.32 | 3   |
| '213768_s_at' | '230682_x_at' | 0.32 | 0.32 | 3   |
| '214404_x_at' | '218445_at'   | 0.30 | 0.30 | 6_1 |
| '214404_x_at' | '223468_s_at' | 0.30 | 0.32 | 6_1 |
| '214486_x_at' | '219727_at'   | 0.31 | 0.31 | 6_1 |
| '214486_x_at' | '223950_s_at' | 0.32 | 0.34 | 6_1 |
| '214486_x_at' | '226638_at'   | 0.31 | 0.32 | 6_1 |
| '214486_x_at' | '228912_at'   | 0.30 | 0.30 | 3   |
| '214602_at'   | '219727_at'   | 0.31 | 0.31 | 6_1 |
| '214898_x_at' | '227759_at'   | 0.31 | 0.32 | 6_1 |
| '216850_at'   | '219301_s_at' | 0.33 | 0.33 | 6_1 |
| '216850_at'   | '219727_at'   | 0.31 | 0.31 | 6_1 |
| '216850_at'   | '228912_at'   | 0.31 | 0.32 | 3   |
| '216850_at'   | '238878_at'   | 0.31 | 0.31 | 3   |

|               |               |      |      |     |
|---------------|---------------|------|------|-----|
| '217495_x_at' | '230682_x_at' | 0.31 | 0.31 | 3   |
| '218413_s_at' | '223779_at'   | 0.30 | 0.31 | 5_2 |
| '218445_at'   | '244321_at'   | 0.30 | 0.30 | 2   |
| '219558_at'   | '219727_at'   | 0.32 | 0.32 | 2   |
| '219558_at'   | '228912_at'   | 0.30 | 0.30 | 6_2 |
| '219727_at'   | '233720_at'   | 0.35 | 0.37 | 6_2 |
| '219727_at'   | '239719_at'   | 0.33 | 0.33 | 2   |
| '219926_at'   | '220262_s_at' | 0.34 | 0.34 | 4   |
| '220709_at'   | '221052_at'   | 0.31 | 0.31 | 5_2 |
| '221967_at'   | '228463_at'   | 0.31 | 0.31 | 6_2 |
| '222712_s_at' | '230822_at'   | 0.31 | 0.32 | 3   |
| '223169_s_at' | '235486_at'   | 0.31 | 0.31 | 5_1 |
| '223642_at'   | '224555_x_at' | 0.33 | 0.33 | 6_2 |
| '224555_x_at' | '244321_at'   | 0.33 | 0.33 | 6_1 |
| '227806_at'   | '229073_at'   | 0.30 | 0.31 | 5_2 |
| '227865_at'   | '235486_at'   | 0.30 | 0.30 | 5_1 |
| '228342_s_at' | '236436_at'   | 0.30 | 0.30 | 3   |
| '228342_s_at' | '244321_at'   | 0.32 | 0.32 | 6_1 |
| '228463_at'   | '230682_x_at' | 0.33 | 0.35 | 3   |
| '228625_at'   | '244321_at'   | 0.31 | 0.31 | 2   |
| '228912_at'   | '230682_x_at' | 0.31 | 0.32 | 3   |
| '229407_at'   | '233720_at'   | 0.31 | 0.32 | 6_2 |
| '230682_x_at' | '231179_at'   | 0.31 | 0.31 | 3   |
| '233720_at'   | '238878_at'   | 0.33 | 0.34 | 3   |
| '236055_at'   | '238962_at'   | 0.30 | 0.31 | 5_2 |
| '238176_at'   | '244321_at'   | 0.33 | 0.33 | 6_1 |
| '238878_at'   | '239719_at'   | 0.30 | 0.30 | 6_1 |
