# Supplementary material for: Identification of Logic Relationships between Genes and Subtypes of Non-Small Cell Lung Cancer
Source: PubMed Central journal article supplement (PMC3990524; doi:10.1371/journal.pone.0094644), 2014-04-17
Supplement: pone.0094644.s005.pdf [file pone.0094644.s005.pdf]

Supporting Information -Table S2: List of gene-AC lower and higher logic relationships, each of which is generated from more than one probe-AC lower and higher logic relationship.

Table A 44 gene-AC lower logic relationships from 101 probe-AC lower logic relationships

| Probe          | Gene       | Type (Gene-AC) | Type (Gene-SCC) |
|----------------|------------|----------------|-----------------|
| '206046_at'    | 'ADAM23'   | 2              | 1               |
| '244463_at'    | 'ADAM23'   | 2              | 1               |
| '207675_x_at'  | 'ARTN'     | 2              | 1               |
| '210237_at'    | 'ARTN'     | 2              | 1               |
| '236083_at'    | 'BCL2L15'  | 1              | 2               |
| '236979_at'    | 'BCL2L15'  | 1              | 2               |
| '209590_at'    | 'BMP7'     | 2              | 1               |
| '209591_s_at'  | 'BMP7'     | 2              | 1               |
| '211259_s_at'  | 'BMP7'     | 2              | 1               |
| '1552487_a_at' | 'BNC1'     | 2              | 1               |
| '206581_at'    | 'BNC1'     | 2              | 1               |
| '227735_s_at'  | 'C10orf99' | 2              | 1               |
| '227736_at'    | 'C10orf99' | 2              | 1               |
| '240353_s_at'  | 'C12orf54' | 2              | 1               |
| '240354_at'    | 'C12orf54' | 2              | 1               |
| '1553705_a_at' | 'CHRM3'    | 2              | 1               |
| '1559633_a_at' | 'CHRM3'    | 2              | 1               |
| '214596_at'    | 'CHRM3'    | 2              | 1               |
| '206164_at'    | 'CLCA2'    | 2              | 1               |
| '206165_s_at'  | 'CLCA2'    | 2              | 1               |
| '206166_s_at'  | 'CLCA2'    | 2              | 1               |
| '217528_at'    | 'CLCA2'    | 2              | 1               |
| '210945_at'    | 'COL4A6'   | 2              | 1               |
| '211473_s_at'  | 'COL4A6'   | 2              | 1               |
| '213992_at'    | 'COL4A6'   | 2              | 1               |
| '239309_at'    | 'DLX6'     | 2              | 1               |
| '242940_x_at'  | 'DLX6'     | 2              | 1               |
| '206032_at'    | 'DSC3'     | 2              | 1               |
| '206033_s_at'  | 'DSC3'     | 2              | 1               |
| '205595_at'    | 'DSG3'     | 2              | 1               |
| '235075_at'    | 'DSG3'     | 2              | 1               |
| '1556793_a_at' | 'FAM83C'   | 2              | 1               |
| '1563805_a_at' | 'FAM83C'   | 2              | 1               |
| '1569688_at'   | 'FMO5'     | 1              | 2               |
| '215300_s_at'  | 'FMO5'     | 1              | 2               |
| '204948_s_at'  | 'FST'      | 2              | 1               |
| '207345_at'    | 'FST'      | 2              | 1               |

|                |             |   |   |
|----------------|-------------|---|---|
| '1559606_at'   | 'GBP6'      | 2 | 1 |
| '1559607_s_at' | 'GBP6'      | 2 | 1 |
| '208600_s_at'  | 'GPR39'     | 1 | 2 |
| '229105_at'    | 'GPR39'     | 1 | 2 |
| '207397_s_at'  | 'HOXD13'    | 2 | 1 |
| '236681_at'    | 'HOXD13'    | 2 | 1 |
| '209126_x_at'  | 'KRT6B'     | 2 | 1 |
| '213680_at'    | 'KRT6B'     | 2 | 1 |
| '1554252_a_at' | 'LASS3'     | 2 | 1 |
| '1554253_a_at' | 'LASS3'     | 2 | 1 |
| '1565936_a_at' | 'LMO3'      | 1 | 2 |
| '1565937_a_at' | 'LMO3'      | 1 | 2 |
| '1555942_a_at' | 'LOC642587' | 2 | 1 |
| '226755_at'    | 'LOC642587' | 2 | 1 |
| '1553169_at'   | 'LRRN4'     | 1 | 2 |
| '1553171_x_at' | 'LRRN4'     | 1 | 2 |
| '214680_at'    | 'NTRK2'     | 2 | 1 |
| '221795_at'    | 'NTRK2'     | 2 | 1 |
| '221796_at'    | 'NTRK2'     | 2 | 1 |
| '229463_at'    | 'NTRK2'     | 2 | 1 |
| '236095_at'    | 'NTRK2'     | 2 | 1 |
| '210721_s_at'  | 'PAK7'      | 2 | 1 |
| '213990_s_at'  | 'PAK7'      | 2 | 1 |
| '205646_s_at'  | 'PAX6'      | 2 | 1 |
| '235795_at'    | 'PAX6'      | 2 | 1 |
| '206751_s_at'  | 'PCYT1B'    | 2 | 1 |
| '232553_at'    | 'PCYT1B'    | 2 | 1 |
| '208502_s_at'  | 'PITX1'     | 2 | 1 |
| '209587_at'    | 'PITX1'     | 2 | 1 |
| '205724_at'    | 'PKP1'      | 2 | 1 |
| '221854_at'    | 'PKP1'      | 2 | 1 |
| '233801_s_at'  | 'SEMA6D'    | 2 | 1 |
| '233882_s_at'  | 'SEMA6D'    | 2 | 1 |
| '211361_s_at'  | 'SERPINB13' | 2 | 1 |
| '211362_s_at'  | 'SERPINB13' | 2 | 1 |
| '216258_s_at'  | 'SERPINB13' | 2 | 1 |
| '217272_s_at'  | 'SERPINB13' | 2 | 1 |
| '209719_x_at'  | 'SERPINB3'  | 2 | 1 |
| '209720_s_at'  | 'SERPINB3'  | 2 | 1 |
| '213308_at'    | 'SHANK2'    | 1 | 2 |
| '243681_at'    | 'SHANK2'    | 1 | 2 |
| '1557918_s_at' | 'SLC16A1'   | 2 | 1 |
| '202235_at'    | 'SLC16A1'   | 2 | 1 |

|                |           |   |   |
|----------------|-----------|---|---|
| '1554050_at'   | 'SMPDL3B' | 1 | 2 |
| '205309_at'    | 'SMPDL3B' | 1 | 2 |
| '206122_at'    | 'SOX15'   | 2 | 1 |
| '217040_x_at'  | 'SOX15'   | 2 | 1 |
| '213796_at'    | 'SPRR1A'  | 2 | 1 |
| '214549_x_at'  | 'SPRR1A'  | 2 | 1 |
| '218990_s_at'  | 'SPRR3'   | 2 | 1 |
| '232082_x_at'  | 'SPRR3'   | 2 | 1 |
| '1552543_a_at' | 'STON2'   | 2 | 1 |
| '235852_at'    | 'STON2'   | 2 | 1 |
| '205102_at'    | 'TMPRSS2' | 1 | 2 |
| '226553_at'    | 'TMPRSS2' | 1 | 2 |
| '1555581_a_at' | 'TP63'    | 2 | 1 |
| '207382_at'    | 'TP63'    | 2 | 1 |
| '211194_s_at'  | 'TP63'    | 2 | 1 |
| '211195_s_at'  | 'TP63'    | 2 | 1 |
| '211834_s_at'  | 'TP63'    | 2 | 1 |
| '202504_at'    | 'TRIM29'  | 2 | 1 |
| '211002_s_at'  | 'TRIM29'  | 2 | 1 |
| '206458_s_at'  | 'WNT2B'   | 2 | 1 |
| '206459_s_at'  | 'WNT2B'   | 2 | 1 |

Table B Six gene-AC higher logic relationships from 14 probe-AC higher logic relationships

| Probe1        | Probe2        | Gene1   | Gene2   | Type<br>(Gene-AC) | Type<br>(Gene-SCC) |
|---------------|---------------|---------|---------|-------------------|--------------------|
| '209985_s_at' | '230682_x_at' | 'ASCL1' | 'ABCC3' | 3                 | 4                  |
| '213768_s_at' | '230682_x_at' | 'ASCL1' | 'ABCC3' | 3                 | 4                  |
| '210727_at'   | '230682_x_at' | 'CALCA' | 'ABCC3' | 3                 | 4                  |
| '210728_s_at' | '230682_x_at' | 'CALCA' | 'ABCC3' | 3                 | 4                  |
| '217495_x_at' | '230682_x_at' | 'CALCA' | 'ABCC3' | 3                 | 4                  |
| '202831_at'   | '205649_s_at' | 'GPX2'  | 'FGA'   | 6_2               | 5_1                |
| '202831_at'   | '205650_s_at' | 'GPX2'  | 'FGA'   | 6_2               | 5_1                |
| '206343_s_at' | '214774_x_at' | 'NRG1'  | 'TOX3'  | 5_2               | 6_1                |
| '206343_s_at' | '215108_x_at' | 'NRG1'  | 'TOX3'  | 5_2               | 6_1                |
| '206343_s_at' | '216623_x_at' | 'NRG1'  | 'TOX3'  | 5_2               | 6_1                |
| '203438_at'   | '205649_s_at' | 'STC2'  | 'FGA'   | 6_2               | 5_1                |
| '203438_at'   | '205650_s_at' | 'STC2'  | 'FGA'   | 6_2               | 5_1                |
| '1554062_at'  | '205506_at'   | 'XG'    | 'VIL1'  | 6_2               | 5_1                |
| '1554062_at'  | '228912_at'   | 'XG'    | 'VIL1'  | 6_2               | 5_1                |
