# Supplementary material for: Identification of Logic Relationships between Genes and Subtypes of Non-Small Cell Lung Cancer
Source: PubMed Central journal article supplement (PMC3990524; doi:10.1371/journal.pone.0094644), 2014-04-17
Supplement: pone.0094644.s006.pdf [file pone.0094644.s006.pdf]

Supporting Information -Table S3: List of gene-AC/SCC lower and higher logic relationships identified in this paper.

Table A 217 gene-AC/SCC lower logic relationships

| Series number | Gene      | Type<br>(Gene-AC) | Type<br>(Gene-SCC) |
|---------------|-----------|-------------------|--------------------|
| 1             | DST       | 2                 | 1                  |
| 2             | CLCA2     | 2                 | 1                  |
| 3             | KRT5      | 2                 | 1                  |
| 4             | DSG3      | 2                 | 1                  |
| 5             | GJB5      | 2                 | 1                  |
| 6             | SERPINB13 | 2                 | 1                  |
| 7             | S1PR5     | 2                 | 1                  |
| 8             | BNC1      | 2                 | 1                  |
| 9             | TRIM29    | 2                 | 1                  |
| 10            | LOC642587 | 2                 | 1                  |
| 11            | PKP1      | 2                 | 1                  |
| 12            | ADAM23    | 2                 | 1                  |
| 13            | KRT6B     | 2                 | 1                  |
| 14            | FAT2      | 2                 | 1                  |
| 15            | GOLT1A    | 1                 | 2                  |
| 16            | DSC3      | 2                 | 1                  |
| 17            | NKX2-1    | 1                 | 2                  |
| 18            | TP63      | 2                 | 1                  |
| 19            | RORC      | 1                 | 2                  |
| 20            | LASS3     | 2                 | 1                  |
| 21            | SMPDL3B   | 1                 | 2                  |
| 22            | PVRL1     | 2                 | 1                  |
| 23            | DAPL1     | 2                 | 1                  |
| 24            | RGL3      | 1                 | 2                  |
| 25            | NTRK2     | 2                 | 1                  |
| 26            | COL7A1    | 2                 | 1                  |
| 27            | FMO5      | 1                 | 2                  |
| 28            | GBP6      | 2                 | 1                  |
| 29            | SOX15     | 2                 | 1                  |
| 30            | SERPINB2  | 2                 | 1                  |
| 31            | FAM83B    | 2                 | 1                  |
| 32            | KRT13     | 2                 | 1                  |
| 33            | ODZ2      | 2                 | 1                  |
| 34            | ATP11A    | 1                 | 2                  |
| 35            | KRT16     | 2                 | 1                  |
| 36            | A2ML1     | 2                 | 1                  |

|    |           |   |   |
|----|-----------|---|---|
| 37 | GJB6      | 2 | 1 |
| 38 | TMEM40    | 2 | 1 |
| 39 | ADH7      | 2 | 1 |
| 40 | TMPRSS11D | 2 | 1 |
| 41 | HNF1B     | 1 | 2 |
| 42 | GPR39     | 1 | 2 |
| 43 | SPRR3     | 2 | 1 |
| 44 | FAM83C    | 2 | 1 |
| 45 | SLC16A1   | 2 | 1 |
| 46 | ULBP2     | 2 | 1 |
| 47 | SPRR1A    | 2 | 1 |
| 48 | KRT14     | 2 | 1 |
| 49 | COL4A6    | 2 | 1 |
| 50 | PLEKHA6   | 1 | 2 |
| 51 | SPRR2B    | 2 | 1 |
| 52 | VSTM2L    | 1 | 2 |
| 53 | IGSF11    | 2 | 1 |
| 54 | FOXD1     | 2 | 1 |
| 55 | HES2      | 2 | 1 |
| 56 | PAX6      | 2 | 1 |
| 57 | GRHL3     | 2 | 1 |
| 58 | C10orf99  | 2 | 1 |
| 59 | DLX5      | 2 | 1 |
| 60 | STK32A    | 1 | 2 |
| 61 | HOPX      | 1 | 2 |
| 62 | CLDN3     | 1 | 2 |
| 63 | S100A7    | 2 | 1 |
| 64 | GPC1      | 2 | 1 |
| 65 | CAPNS2    | 2 | 1 |
| 66 | C12orf54  | 2 | 1 |
| 67 | WNT2B     | 2 | 1 |
| 68 | NUDT11    | 2 | 1 |
| 69 | C1orf210  | 1 | 2 |
| 70 | BMP7      | 2 | 1 |
| 71 | GJB3      | 2 | 1 |
| 72 | CHRM3     | 2 | 1 |
| 73 | DNALI1    | 1 | 2 |
| 74 | SERPINB5  | 2 | 1 |
| 75 | PI3       | 2 | 1 |
| 76 | LYPD3     | 2 | 1 |
| 77 | LOC146429 | 1 | 2 |
| 78 | MRAP2     | 2 | 1 |
| 79 | PCDH19    | 2 | 1 |

|     |          |   |   |
|-----|----------|---|---|
| 80  | LPAR3    | 2 | 1 |
| 81  | FOXL2    | 2 | 1 |
| 82  | DLX1     | 2 | 1 |
| 83  | RNASE7   | 2 | 1 |
| 84  | SH3GL3   | 2 | 1 |
| 85  | STARD5   | 2 | 1 |
| 86  | ABCC6    | 1 | 2 |
| 87  | COL4A3   | 1 | 2 |
| 88  | MMP15    | 1 | 2 |
| 89  | LGSN     | 1 | 2 |
| 90  | FAM181B  | 2 | 1 |
| 91  | SPRR1B   | 2 | 1 |
| 92  | FETUB    | 2 | 1 |
| 93  | ARTN     | 2 | 1 |
| 94  | LMO3     | 1 | 2 |
| 95  | SLC2A1   | 2 | 1 |
| 96  | KRT6A    | 2 | 1 |
| 97  | APOH     | 1 | 2 |
| 98  | PAK7     | 2 | 1 |
| 99  | MSTP9    | 1 | 2 |
| 100 | ARRB1    | 1 | 2 |
| 101 | ARHGEF4  | 2 | 1 |
| 102 | ZFP64    | 2 | 1 |
| 103 | RAPGEFL1 | 2 | 1 |
| 104 | B3GNT6   | 1 | 2 |
| 105 | LRRC31   | 1 | 2 |
| 106 | PITX1    | 2 | 1 |
| 107 | PLEKHB1  | 1 | 2 |
| 108 | EIF5A2   | 2 | 1 |
| 109 | ABCA13   | 2 | 1 |
| 110 | FGFR2    | 2 | 1 |
| 111 | TRIM7    | 2 | 1 |
| 112 | BCL2L15  | 1 | 2 |
| 113 | KRT31    | 2 | 1 |
| 114 | CLCA4    | 2 | 1 |
| 115 | TMPRSS2  | 1 | 2 |
| 116 | ARNTL2   | 2 | 1 |
| 117 | FAM83F   | 2 | 1 |
| 118 | ALPK3    | 1 | 2 |
| 119 | SERPINB4 | 2 | 1 |
| 120 | TNS4     | 2 | 1 |
| 121 | PLD1     | 2 | 1 |
| 122 | ATP1B3   | 2 | 1 |

|     |           |   |   |
|-----|-----------|---|---|
| 123 | SEMA6D    | 2 | 1 |
| 124 | MICALL1   | 2 | 1 |
| 125 | MARK1     | 2 | 1 |
| 126 | SERPINB3  | 2 | 1 |
| 127 | PHLDB2    | 2 | 1 |
| 128 | LRRN4     | 1 | 2 |
| 129 | LOC145786 | 1 | 2 |
| 130 | BIRC5     | 2 | 1 |
| 131 | SLC6A15   | 2 | 1 |
| 132 | SOX2      | 2 | 1 |
| 133 | PCYT1B    | 2 | 1 |
| 134 | KRTDAP    | 2 | 1 |
| 135 | WFDC5     | 2 | 1 |
| 136 | DLX6      | 2 | 1 |
| 137 | C3orf21   | 2 | 1 |
| 138 | EFCAB4A   | 1 | 2 |
| 139 | GDA       | 2 | 1 |
| 140 | LONRF3    | 1 | 2 |
| 141 | LCE3D     | 2 | 1 |
| 142 | ALOX12    | 2 | 1 |
| 143 | ICA1      | 1 | 2 |
| 144 | KLHDC7A   | 1 | 2 |
| 145 | WDR72     | 2 | 1 |
| 146 | CALML3    | 2 | 1 |
| 147 | GNA14     | 1 | 2 |
| 148 | ARSE      | 1 | 2 |
| 149 | RHCG      | 2 | 1 |
| 150 | VSNL1     | 2 | 1 |
| 151 | WFDC3     | 1 | 2 |
| 152 | SHANK2    | 1 | 2 |
| 153 | LIMCH1    | 1 | 2 |
| 154 | C9orf125  | 2 | 1 |
| 155 | RAB17     | 1 | 2 |
| 156 | BCL11A    | 2 | 1 |
| 157 | DENND2C   | 2 | 1 |
| 158 | KCTD14    | 1 | 2 |
| 159 | ALDH3B1   | 1 | 2 |
| 160 | HOXA1     | 2 | 1 |
| 161 | DMRT3     | 2 | 1 |
| 162 | HOXD13    | 2 | 1 |
| 163 | LOC440335 | 1 | 2 |
| 164 | RMND5A    | 2 | 1 |
| 165 | FOXE1     | 2 | 1 |

|     |             |   |   |
|-----|-------------|---|---|
| 166 | ACSM3       | 1 | 2 |
| 167 | SBSN        | 2 | 1 |
| 168 | KCNG1       | 2 | 1 |
| 169 | SMO         | 2 | 1 |
| 170 | C3orf34     | 2 | 1 |
| 171 | RBPM5       | 1 | 2 |
| 172 | GALNT10     | 1 | 2 |
| 173 | PRIMA1      | 2 | 1 |
| 174 | B3GNT7      | 1 | 2 |
| 175 | C5orf4      | 1 | 2 |
| 176 | CCNJL       | 1 | 2 |
| 177 | STON2       | 2 | 1 |
| 178 | TMEM125     | 1 | 2 |
| 179 | SPDEF       | 1 | 2 |
| 180 | CXCL2       | 1 | 2 |
| 181 | SFTA2       | 1 | 2 |
| 182 | RNF7        | 2 | 1 |
| 183 | EXO1        | 2 | 1 |
| 184 | RC3H2       | 2 | 1 |
| 185 | GPR87       | 2 | 1 |
| 186 | EN1         | 2 | 1 |
| 187 | ENPP3       | 1 | 2 |
| 188 | SLC44A4     | 1 | 2 |
| 189 | LOC440173   | 2 | 1 |
| 190 | TGM1        | 2 | 1 |
| 191 | SLC1A7      | 1 | 2 |
| 192 | AGR2        | 1 | 2 |
| 193 | TMTC1       | 2 | 1 |
| 194 | C4BPB       | 1 | 2 |
| 195 | CAPN8       | 1 | 2 |
| 196 | DPP4        | 1 | 2 |
| 197 | FST         | 2 | 1 |
| 198 | hCG_1643808 | 1 | 2 |
| 199 | DCUN1D1     | 2 | 1 |
| 200 | IYD         | 1 | 2 |
| 201 | ADA         | 2 | 1 |
| 202 | KCTD15      | 2 | 1 |
| 203 | MST1        | 1 | 2 |
| 204 | CGN         | 1 | 2 |
| 205 | OVGP1       | 1 | 2 |
| 206 | SNCAIP      | 2 | 1 |
| 207 | ATP11B      | 2 | 1 |
| 208 | RHOBTB2     | 1 | 2 |

|     |          |   |   |
|-----|----------|---|---|
| 209 | ADCY10   | 2 | 1 |
| 210 | MYBL2    | 2 | 1 |
| 211 | P2RY1    | 2 | 1 |
| 212 | SORBS2   | 1 | 2 |
| 213 | C15orf42 | 2 | 1 |
| 214 | CACNA1D  | 1 | 2 |
| 215 | D4S234E  | 2 | 1 |
| 216 | PLAC2    | 2 | 1 |
| 217 | CABLES1  | 1 | 2 |

Table B 162 gene-AC/SCC higher logic relationships

| Series number | Gene1   | Gene2        | Type<br>(Gene-AC) | Type<br>(Gene-SCC) |
|---------------|---------|--------------|-------------------|--------------------|
| 1             | DUOX2   | SORBS2       | 6_2               | 5_1                |
| 2             | PTHLH   | FOXA3        | 6_2               | 5_1                |
| 3             | GPX2    | FGA          | 6_2               | 5_1                |
| 4             | VSNL1   | SNTB1        | 6_2               | 5_1                |
| 5             | CALCA   | ABCC3        | 3                 | 4                  |
| 6             | PLEKHG3 | TMEM61       | 6_2               | 5_1                |
| 7             | IRF6    | SNTB1        | 6_2               | 5_1                |
| 8             | VSNL1   | ZRANB1       | 6_2               | 5_1                |
| 9             | POPDC3  | DLK2         | 4                 | 3                  |
| 10            | TFAP2A  | ABCC3        | 6_2               | 5_1                |
| 11            | FOXA3   | ABCC3        | 3                 | 4                  |
| 12            | IRF6    | SNTB1        | 6_2               | 5_1                |
| 13            | PTHLH   | CALCA        | 7                 | 8                  |
| 14            | STC2    | MESP1        | 6_1               | 5_2                |
| 15            | IRF6    | SLC4A4       | 6_2               | 5_1                |
| 16            | FGA     | ABCC3        | 3                 | 4                  |
| 17            | COBL    | PGAP1        | 6_1               | 5_2                |
| 18            | GPC1    | CFLAR        | 6_2               | 5_1                |
| 19            | B3GNT5  | GPC1         | 2                 | 1                  |
| 20            | IL1F7   | PGAP1        | 6_1               | 5_2                |
| 21            | B3GNT5  | RGS7         | 6_2               | 5_1                |
| 22            | PTHLH   | VIL1         | 6_2               | 5_1                |
| 23            | SORBS2  | ARX          | 3                 | 4                  |
| 24            | FAM62C  | LOC100128191 | 5_1               | 6_2                |
| 25            | GPX2    | FOXA3        | 6_2               | 5_1                |
| 26            | GAP43   | DUOX2        | 2                 | 1                  |
| 27            | GLB1L3  | FOXA3        | 3                 | 4                  |
| 28            | GPX2    | GJB1         | 6_2               | 5_1                |

|    |           |           |     |     |
|----|-----------|-----------|-----|-----|
| 29 | MGC14425  | CDC25A    | 6_1 | 5_2 |
| 30 | CFLAR     | FLYWCH1   | 6_1 | 5_2 |
| 31 | ITGB4     | ABCC3     | 6_2 | 5_1 |
| 32 | PBX1      | C11orf41  | 4   | 3   |
| 33 | SEMA3E    | DUOX2     | 6_1 | 5_2 |
| 34 | RGS7      | ABCC3     | 3   | 4   |
| 35 | PTHLH     | DUOX2     | 2   | 1   |
| 36 | ZIC2      | IL1F7     | 6_2 | 5_1 |
| 37 | RAPGEF2   | PGAP1     | 6_1 | 5_2 |
| 38 | UGT2B4    | ABCC3     | 3   | 4   |
| 39 | GJB1      | AKR1C2    | 6_1 | 5_2 |
| 40 | GLB1L3    | VIL1      | 3   | 4   |
| 41 | DUOX2     | CD109     | 2   | 1   |
| 42 | SNRPN     | CNTNAP2   | 6_1 | 5_2 |
| 43 | ARHGAP11A | VIL1      | 6_2 | 5_1 |
| 44 | MGC14425  | SEMA3E    | 3   | 4   |
| 45 | PTHLH     | IL17RB    | 6_2 | 5_1 |
| 46 | WDR66     | SLC25A45  | 5_2 | 6_1 |
| 47 | KRT17     | UBXN10    | 6_2 | 5_1 |
| 48 | NRG1      | LOC730496 | 5_2 | 6_1 |
| 49 | ASCL1     | ABCC3     | 3   | 4   |
| 50 | IRF6      | BTBD9     | 6_2 | 5_1 |
| 51 | PLEKHG3   | WDR1      | 6_2 | 5_1 |
| 52 | PTHLH     | PAEP      | 6_2 | 5_1 |
| 53 | CYP2B7P1  | DLK2      | 5_1 | 6_2 |
| 54 | ALPK3     | PGAP1     | 6_1 | 5_2 |
| 55 | STC2      | RHOBTB2   | 6_2 | 5_1 |
| 56 | LOC339988 | PGAP1     | 6_1 | 5_2 |
| 57 | TNNC2     | RGS7      | 3   | 4   |
| 58 | PLEKHG3   | ARX       | 6_2 | 5_1 |
| 59 | VIL1      | ABCC3     | 3   | 4   |
| 60 | VSNL1     | FGA       | 6_2 | 5_1 |
| 61 | WDR66     | CALML5    | 4   | 3   |
| 62 | FAM184A   | FOXA3     | 3   | 4   |
| 63 | MUC3B     | PCSK9     | 6_1 | 5_2 |
| 64 | PBX1      | IL1F9     | 4   | 3   |
| 65 | POF1B     | C11orf41  | 4   | 3   |
| 66 | SDK1      | SORBS2    | 6_2 | 5_1 |
| 67 | ATP13A3   | DUOX2     | 2   | 1   |
| 68 | MUC5B     | PIP5KL1   | 3   | 4   |
| 69 | GPX2      | SLC2A12   | 2   | 1   |
| 70 | PTHLH     | CALCA     | 7   | 8   |
| 71 | GPC1      | ABCC3     | 6_2 | 5_1 |

|     |           |           |     |     |
|-----|-----------|-----------|-----|-----|
| 72  | TNNC2     | SORBS2    | 3   | 4   |
| 73  | UMODL1    | ABCC3     | 3   | 4   |
| 74  | CFLAR     | ARHGAP23  | 6_1 | 5_2 |
| 75  | GLB1L3    | FGA       | 3   | 4   |
| 76  | MUC13     | TMEM61    | 3   | 4   |
| 77  | SNRPN     | VIL1      | 3   | 4   |
| 78  | TFAP2A    | BCL11A    | 2   | 1   |
| 79  | XG        | VIL1      | 6_2 | 5_1 |
| 80  | GJB1      | DUOX2     | 6_1 | 5_2 |
| 81  | RPTN      | MAGEA4    | 4   | 3   |
| 82  | GPX2      | MUC13     | 6_2 | 5_1 |
| 83  | TFAP2A    | AKR1C2    | 2   | 1   |
| 84  | SEMA3E    | PGAP1     | 6_1 | 5_2 |
| 85  | NRG1      | TOX3      | 5_2 | 6_1 |
| 86  | STC2      | FGA       | 6_2 | 5_1 |
| 87  | COL4A4    | DUOX2     | 6_1 | 5_2 |
| 88  | SNRPN     | DUOX2     | 6_1 | 5_2 |
| 89  | AP3B2     | TFPI2     | 5_2 | 6_1 |
| 90  | COBL      | DYNC1I1   | 6_1 | 5_2 |
| 91  | NXPH4     | FOXA3     | 6_2 | 5_1 |
| 92  | PTHLH     | SNTB1     | 6_2 | 5_1 |
| 93  | SLFN13    | C11orf41  | 5_1 | 6_2 |
| 94  | ABCC3     | IP6K3     | 3   | 4   |
| 95  | PLEKHG3   | CDK6      | 2   | 1   |
| 96  | SPDEF     | RGMA      | 6_1 | 5_2 |
| 97  | LOC284578 | FGA       | 3   | 4   |
| 98  | CYP4F3    | SEMA3E    | 6_2 | 5_1 |
| 99  | AP3B2     | ZNF681    | 5_2 | 6_1 |
| 100 | VSNL1     | XKRX      | 6_2 | 5_1 |
| 101 | ABCA13    | SNTB1     | 6_2 | 5_1 |
| 102 | SNRPN     | ARX       | 3   | 4   |
| 103 | ORC1L     | DUOX2     | 2   | 1   |
| 104 | TFAP2A    | HSPC159   | 2   | 1   |
| 105 | UMODL1    | STC2      | 6_1 | 5_2 |
| 106 | ADD2      | CALML5    | 4   | 3   |
| 107 | COBL      | IPO8      | 6_1 | 5_2 |
| 108 | RHOU      | C11orf41  | 5_1 | 6_2 |
| 109 | CFLAR     | DUOX2     | 6_1 | 5_2 |
| 110 | GPX2      | UBXN10    | 6_2 | 5_1 |
| 111 | ITGB4     | HOXD10    | 2   | 1   |
| 112 | C16orf74  | LOC145786 | 5_2 | 6_1 |
| 113 | PBX1      | POPDC3    | 4   | 3   |
| 114 | CTNND2    | ABCC3     | 3   | 4   |

|     |           |           |     |     |
|-----|-----------|-----------|-----|-----|
| 115 | DYNC1I1   | FGA       | 6_2 | 5_1 |
| 116 | FGA       | GAL       | 6_1 | 5_2 |
| 117 | AP3B2     | LRP2      | 5_2 | 6_1 |
| 118 | DOK1      | C11orf41  | 5_1 | 6_2 |
| 119 | TNNC2     | C11orf41  | 6_1 | 5_2 |
| 120 | WDR66     | RAF1      | 5_2 | 6_1 |
| 121 | GPC1      | CDK6      | 2   | 1   |
| 122 | TNNC2     | FGA       | 3   | 4   |
| 123 | IRF6      | COBL      | 6_2 | 5_1 |
| 124 | RHOBTB2   | SETD8     | 6_1 | 5_2 |
| 125 | DQX1      | ZNF681    | 5_2 | 6_1 |
| 126 | PTHLH     | CITED4    | 2   | 1   |
| 127 | FOXA2     | DUOX2     | 6_1 | 5_2 |
| 128 | IRF6      | GSDMC     | 2   | 1   |
| 129 | GPX2      | ITGB8     | 2   | 1   |
| 130 | CYP2B7P1  | MAGEA4    | 5_1 | 6_2 |
| 131 | CITED4    | PGAP1     | 2   | 1   |
| 132 | ZNF556    | TDRKH     | 5_2 | 6_1 |
| 133 | HTR2C     | C11orf41  | 4   | 3   |
| 134 | LOC283485 | HABP2     | 5_2 | 6_1 |
| 135 | MRPS12    | RBPM5     | 6_2 | 5_1 |
| 136 | FGA       | AKR1C2    | 6_1 | 5_2 |
| 137 | C1orf110  | C11orf41  | 4   | 3   |
| 138 | ARX       | CD109     | 6_1 | 5_2 |
| 139 | RGS7      | CFLAR     | 3   | 4   |
| 140 | ARHGAP11A | VIL1      | 6_2 | 5_1 |
| 141 | ATP13A3   | VIL1      | 6_2 | 5_1 |
| 142 | HPN       | MAGEA4    | 5_1 | 6_2 |
| 143 | SYT14     | LOC730496 | 5_2 | 6_1 |
| 144 | ZNF639    | MGC10981  | 5_2 | 6_1 |
| 145 | TFAP2A    | IL1F7     | 6_2 | 5_1 |
| 146 | PTHLH     | PSG6      | 6_2 | 5_1 |
| 147 | ALPK3     | SLC25A45  | 3   | 4   |
| 148 | VSNL1     | FGF9      | 6_2 | 5_1 |
| 149 | B3GNT5    | GSDMC     | 2   | 1   |
| 150 | SPDEF     | H2AFY2    | 6_1 | 5_2 |
| 151 | ITGA3     | MGC10981  | 1   | 2   |
| 152 | PTHLH     | ZRANB1    | 6_2 | 5_1 |
| 153 | COBL      | B3GNT5    | 6_1 | 5_2 |
| 154 | VSNL1     | CFLAR     | 6_2 | 5_1 |
| 155 | PBX1      | CNFN      | 4   | 3   |
| 156 | AQP4      | GOLGA2L1  | 1   | 2   |
| 157 | C9orf103  | C11orf41  | 5_1 | 6_2 |

|     |        |          |     |     |
|-----|--------|----------|-----|-----|
| 158 | NRG1   | C16orf89 | 5_2 | 6_1 |
| 159 | VIL1   | COL4A3   | 3   | 4   |
| 160 | ATP8A1 | IL1F7    | 3   | 4   |
| 161 | H2AFY2 | PGAP1    | 2   | 1   |
| 162 | CFLAR  | VIL1     | 3   | 4   |
