# Supplementary material for: Identification of Logic Relationships between Genes and Subtypes of Non-Small Cell Lung Cancer
Source: PubMed Central journal article supplement (PMC3990524; doi:10.1371/journal.pone.0094644), 2014-04-17
Supplement: pone.0094644.s009.pdf [file pone.0094644.s009.pdf]

Supporting Information -Table S6: Gene pairs related with AC or SCC through the logic function AND or XOR

| Gene1   | Gene2    | Type<br>(Gene-AC) | Type<br>(Gene-SCC) |
|---------|----------|-------------------|--------------------|
| ITGA3   | MGC10981 | 1                 | 2                  |
| AQP4    | GOLGA2L1 | 1                 | 2                  |
| B3GNT5  | GPC1     | 2                 | 1                  |
| GAP43   | DUOX2    | 2                 | 1                  |
| PTHLH   | DUOX2    | 2                 | 1                  |
| DUOX2   | CD109    | 2                 | 1                  |
| ATP13A3 | DUOX2    | 2                 | 1                  |
| GPX2    | SLC2A12  | 2                 | 1                  |
| TFAP2A  | BCL11A   | 2                 | 1                  |
| TFAP2A  | AKR1C2   | 2                 | 1                  |
| PLEKHG3 | CDK6     | 2                 | 1                  |
| ORC1L   | DUOX2    | 2                 | 1                  |
| TFAP2A  | HSPC159  | 2                 | 1                  |
| ITGB4   | HOXD10   | 2                 | 1                  |
| GPC1    | CDK6     | 2                 | 1                  |
| PTHLH   | CITED4   | 2                 | 1                  |
| IRF6    | GSDMC    | 2                 | 1                  |
| GPX2    | ITGB8    | 2                 | 1                  |
| CITED4  | PGAP1    | 2                 | 1                  |
| B3GNT5  | GSDMC    | 2                 | 1                  |
| H2AFY2  | PGAP1    | 2                 | 1                  |
| PTHLH   | CALCA    | 7                 | 8                  |
